# Supplementary material for: Is gingival bleeding a symptom of type 2 and 3 von Willebrand disease?
Source: PLOS journal article supplement (doi:10.1371/journal.pone.0191291), 2018-01-25
Supplement: S1 (10.1371/journal.pone.0191291.s001) [file journal.pone.0191291.s001.pdf]

| NUMBER INITIALS | TEST | FEMALE | F11 | VWDTYP VWD2TYP |
|-----------------|------|--------|-----|----------------|
| 1 SEMA          | 1    | 1      | 0   | 1 A            |
| 2 STMO          | 1    | 1      | 1   | 1 N            |
| 3 MOHE          | 1    | 1      | 1   | 1 A            |
| 4 KAGE          | 1    | 0      |     | 1 A            |
| 5 MOSA          | 1    | 1      | 1   | 1 M            |
| 6 MOEL          | 1    | 1      | 1   | 1 M            |
| 7 ROLI          | 1    | 1      | 0   | 1 B            |
| 8 GUTH          | 1    | 0      |     | 1 N            |
| 9 MUAC          | 1    | 0      |     | 2              |
| 10 PEOR         | 1    | 0      |     | 2              |
| 11 PACA         | 1    | 1      | 1   | 1 A            |
| 12 AWAT         | 1    | 0      |     | 2              |
| 13 VEMO         | 1    | 1      | 1   | 1 A            |
| 14 WIRO         | 1    | 0      |     | 1 B            |
| 15 FUIR         | 1    | 1      | 0   | 1 A            |
| 16 MOGR         | 1    | 0      |     | 1 B            |
| 17 HONA         | 1    | 1      | 1   | 1 A            |
| 18 MESA         | 1    | 1      | 1   | 1 A            |
| 19 WIAN         | 1    | 1      | 1   | 2              |
| 20 KAHA         | 1    | 1      | 1   | 1 M            |
| 21 HOUL         | 1    | 1      | 1   | 1 A            |
| 22 SCDO         | 1    | 1      | 1   | 1 B            |
| 23 PFCH         | 1    | 1      | 1   | 1 A            |
| 24 GREL         | 1    | 1      | 1   | 1 A            |
| 1 HUEL          | 0    | 1      | 0   | 0              |
| 2 KISO          | 0    | 1      | 0   | 0              |
| 3 KLAN          | 0    | 1      | 0   | 0              |
| 4 LAEV          | 0    | 1      | 0   | 0              |
| 5 RATA          | 0    | 1      | 0   | 0              |
| 6 CAMA          | 0    | 1      | 1   | 0              |
| 7 JUTH          | 0    | 0      |     | 0              |
| 8 GOHE          | 0    | 1      | 0   | 0              |
| 9 MUSO          | 0    | 1      | 0   | 0              |
| 10 EPST         | 0    | 0      |     | 0              |
| 11 REHE         | 0    | 0      |     | 0              |
| 12 FUMA         | 0    | 0      |     | 0              |
| 13 VOSA         | 0    | 1      | 0   | 0              |
| 14 WEHA         | 0    | 0      |     | 0              |
| 15 STBR         | 0    | 1      | 0   | 0              |
| 16 COER         | 0    | 1      | 0   | 0              |
| 17 STIR         | 0    | 1      | 0   | 0              |
| 18 BOCL         | 0    | 1      | 0   | 0              |
| 19 GEBI         | 0    | 1      | 0   | 0              |
| 20 YIAY         | 0    | 1      | 0   | 0              |
| 21 SAJA         | 0    | 1      | 0   | 0              |
| 22 HAIR         | 0    | 1      | 0   | 0              |
| 23 ALTA         | 0    | 0      |     | 0              |
| 24 VOFR         | 0    | 0      |     | 0              |

| AGE | WEIGHT | HBA1C | VWFAG | RICO  | FVIII BLUTGRUP  |
|-----|--------|-------|-------|-------|-----------------|
| 32  | 54     | 4,86  | 22,8  | 12,9  | 33,2 AB RH POS  |
| 62  | 63     | 5,27  | 79,8  | 83,7  | 74,1 O RH POS   |
| 51  | 65     | 5,35  | 42,5  | 13,6  | 36 A RH POS     |
| 56  | 68     | 5,25  | 19,4  | 59,7  | 36,3 AB RH POS  |
| 35  | 70     | 5,57  | 103   | 19,8  | 127,1 O RH POS  |
| 64  | 100    | 6,68  | 227,9 | 48    | 225,6 O RH POS  |
| 33  | 52     | 4,7   | 30    | 5     | 33,2 O RH NEG   |
| 43  | 86     | 4,7   | 34,3  | 38,5  | 17,2 A RH NEG   |
| 56  | 83     | 5,31  | 10    | 7,8   | 40,5 A RH NEG   |
| 49  | 90     | 5,23  | 10    | 4     | 2,4 O RH POS    |
| 50  | 69     | 5,27  | 19,2  | 13,1  | 52,1 A RH POS   |
| 40  | 108    | 6,44  | 10    | 4     | 4,5 O RH POS    |
| 41  | 80     | 5,12  | 45    | 36,6  | 90,5 A RH POS   |
| 44  | 101    | 5,05  | 33    | 12,2  | 36,7 A RH POS   |
| 34  | 68     | 4,91  | 19    | 12,5  | 39,1 O RH POS   |
| 21  | 70     | 5,07  | 67    | 62,5  | 87,4 B RH POS   |
| 45  | 58     | 4,29  | 26    | 25,9  | 50,1 A RH POS   |
| 56  | 55     | 5,05  | 35    | 9     | 49 A RH NEG     |
| 52  | 68     | 4,62  | 9     | 4,2   | 7 A RH POS      |
| 26  | 56     | 4,78  | 24    | 11    | 54,6 ABPOS      |
| 40  | 53     | 4,11  | 67    | 69,9  | 75,6 OPOS       |
| 65  | 55     | 4,92  | 46    | 10,5  | 58,9 OPOS       |
| 50  | 68     | 4,66  | 52    | 15    | 63,4 ONEG       |
| 56  | 78     | 5,31  | 23    | 13,5  | 39,3 APOS       |
| 39  | 74     | 5,47  | 81    | 99    | 107,5 OPOS      |
| 32  | 52     | 4,43  | 150   | 123,2 | 155,1 UNBEKANNT |
| 33  | 84     | 5,21  | 110   | 91,5  | 116,4 UNBEKANNT |
| 25  | 69     | 4,58  | 120   | 108   | 111,9 BPOS      |
| 42  | 55     | 4,6   | 110   | 97,1  | 122,2 BPOS      |
| 49  | 65     | 4,78  | 110   | 137,5 | 118,3 ABPOS     |
| 44  | 78     | 4,79  | 110   | 97,6  | 135,8 ONEG      |
| 32  | 60     | 4,91  | 120   | 117,9 | 101,7 APOS      |
| 58  | 50     | 4,95  | 100   | 119   | 100,1 ONEG      |
| 27  | 78     | 4,9   | 98    | 128   | 104,9 ANEG      |
| 62  | 65     | 5,37  | 83    | 83,7  | 107,5 OPOS      |
| 49  | 76     | 5,21  | 170   | 154,8 | 188,5 UNBEKANNT |
| 58  | 58     | 5,08  | 110   | 117,6 | 136,1 OPOS      |
| 59  | 75     | 5,27  | 150   | 104,9 | 142,7 APOS      |
| 65  | 55     | 5,1   | 239   | 242,8 | 181,1 OPOS      |
| 53  | 83     | 5,44  | 110   | 119,9 | 129 APOS        |
| 65  | 74     | 5,46  | 271   | 261,7 | 200,8 OPOS      |
| 55  | 75     | 5,64  | 84    | 100,3 | 132 OPOS        |
| 56  | 63     | 4,6   | 74    | 71    | 113,2 OPOS      |
| 36  | 65     | 4,64  | 92    | 78,8  | 138,3 BPOS      |
| 30  | 77     | 4,71  | 88    | 95,8  | 124,1 APOS      |
| 55  | 76     | 5,45  | 130   | 142,6 | 129,9 BPOS      |
| 45  | 68     | 5,12  | 100   | 101   | 98,5 APOS       |
| 50  | 68     | 5,41  | 120   | 135,8 | 119,2 APOS      |

| HEPB | HEPC | HIV | SMOKER | RAUCHERE | PPM | PACKYEAR |
|------|------|-----|--------|----------|-----|----------|
| 0    | 0    | 0   | 1      | 1        | 8   | 2        |
| 0    | 0    | 0   | 1      | 1        | 11  | 10       |
| 0    | 0    | 0   | 1      | 1        | 13  | 10       |
| 0    | 0    | 0   | 0      | 0        | 3   | 0        |
| 0    | 0    | 0   | 1      | 1        | 13  | 13       |
| 0    | 0    | 0   | 0      | 0        | 1   | 0        |
| 0    | 0    | 0   | 0      | 0        | 2   | 0        |
| 0    | 0    | 0   | 1      | 1        | 9   | 14       |
| 1    | 1    | 0   | 0      | 0        | 2   | 0        |
| 0    | 0    | 0   | 1      | 1        | 14  | 25       |
| 0    | 0    | 0   | 0      | 1        | 1   | 2        |
| 0    | 1    | 0   | 0      | 0        | 1   | 0        |
| 0    | 0    | 0   | 0      | 0        | 1   | 0        |
| 0    | 0    | 0   | 0      | 0        | 0   | 0        |
| 0    | 0    | 0   | 0      | 0        | 0   | 0        |
| 0    | 0    | 0   | 0      | 0        | 2   | 0        |
| 0    | 0    | 0   | 1      | 1        | 4   | 2        |
| 0    | 1    | 0   | 0      | 0        | 2   | 0        |
| 0    | 1    | 0   | 0      | 0        | 1   | 0        |
| 0    | 0    | 0   | 0      | 0        | 1   | 0        |
| 0    | 0    | 0   | 0      | 0        | 1   | 0        |
| 0    | 0    | 0   | 0      | 0        | 2   | 0        |
| 0    | 0    | 0   | 0      | 0        | 1   | 0        |
| 0    | 0    | 0   | 0      | 0        | 1   | 0        |
| 0    | 0    | 0   | 0      | 0        | 2   | 0        |
| 0    | 0    | 0   | 0      | 0        | 1   | 0        |
| 0    | 0    | 0   | 0      | 0        | 1   | 0        |
| 0    | 0    | 0   | 0      | 0        | 2   | 0        |
| 0    | 0    | 0   | 0      | 0        | 1   | 0        |
| 0    | 0    | 0   | 0      | 0        | 0   | 0        |
| 0    | 0    | 0   | 0      | 0        | 1   | 0        |
| 0    | 0    | 0   | 1      | 1        | 11  | 5        |
| 0    | 0    | 0   | 0      | 1        | 3   | 0        |
| 0    | 0    | 0   | 0      | 0        | 1   | 0        |
| 0    | 0    | 0   | 0      | 0        | 1   | 0        |
| 0    | 0    | 0   | 1      | 1        | 8   | 7        |
| 0    | 0    | 0   | 0      | 0        | 1   | 0        |
| 0    | 0    | 0   | 0      | 0        | 0   | 0        |
| 0    | 0    | 0   | 0      | 0        | 2   | 0        |
| 0    | 0    | 0   | 0      | 0        | 0   | 0        |
| 0    | 0    | 0   | 0      | 0        | 0   | 0        |
| 0    | 0    | 0   | 1      | 1        | 1   | 5        |
| 0    | 0    | 0   | 0      | 0        | 1   | 0        |
| 0    | 0    | 0   | 1      | 1        | 6   | 5        |
| 0    | 0    | 0   | 1      | 1        | 7   | 10       |
| 0    | 0    | 0   | 1      | 1        | 11  | 5        |
| 0    | 0    | 0   | 0      | 0        | 1   | 0        |
| 0    | 0    | 0   | 1      | 1        | 6   | 1,5      |

| AMMP8 | F1 | F2 | F2A | F3 | F4 | F5 |
|-------|----|----|-----|----|----|----|
| 0     | 0  | 1  | 0   | 0  | 0  | 0  |
| 0     | 1  | 0  | 0   | 0  | 0  | 1  |
| 0     | 1  | 1  | 0   | 0  | 0  | 1  |
| 0     | 0  | 0  | 1   | 1  | 0  | 1  |
| 1     | 0  | 1  | 0   | 1  | 0  | 1  |
| 1     | 0  | 0  | 1   | 1  | 1  | 0  |
| 0     | 0  | 1  | 0   | 0  | 1  | 1  |
| 0     | 0  | 1  | 1   | 0  | 0  | 0  |
| 0     | 0  | 0  | 1   | 1  | 0  | 0  |
| 1     | 0  | 0  | 1   | 1  | 1  | 0  |
| 0     | 0  | 0  | 1   | 1  | 0  | 1  |
| 0     | 0  | 0  | 1   | 1  | 0  | 0  |
| 1     | 0  | 0  | 1   | 0  | 0  | 0  |
| 0     | 1  | 1  | 1   | 0  | 0  | 1  |
| 1     | 0  | 0  | 0   | 1  | 0  | 0  |
| 1     | 0  | 0  | 0   | 1  | 1  | 0  |
| 0     | 1  | 1  | 0   | 0  | 1  | 1  |
| 0     | 1  | 0  | 0   | 0  | 0  | 1  |
| 0     | 0  | 0  | 1   | 1  | 0  | 0  |
| 0     | 0  | 1  | 0   | 0  | 0  | 0  |
| 1     | 0  | 0  | 0   | 1  | 1  | 0  |
| 1     | 0  | 1  | 1   | 1  | 1  | 0  |
| 0     | 0  | 0  | 0   | 1  | 0  | 0  |
| 0     | 0  | 1  | 0   | 0  | 0  | 0  |
| 0     | 0  | 1  | 0   | 0  | 0  | 0  |
| 1     | 0  | 1  | 0   | 0  | 0  | 0  |
| 0     | 0  | 1  | 0   | 0  | 0  | 0  |
| 0     | 0  | 1  | 0   | 0  | 0  | 0  |
| 0     | 0  | 1  | 0   | 0  | 0  | 0  |
| 1     | 0  | 0  | 0   | 1  | 1  | 0  |
| 1     | 0  | 0  | 0   | 1  | 1  | 0  |
| 0     | 1  | 1  | 0   | 0  | 0  | 1  |
| 1     | 1  | 1  | 0   | 0  | 0  | 0  |
| 0     | 0  | 1  | 0   | 0  | 0  | 0  |
| 0     | 0  | 1  | 0   | 0  | 0  | 0  |
| 0     | 1  | 1  | 0   | 0  | 0  | 0  |
| 0     | 0  | 1  | 0   | 0  | 0  | 0  |
| 0     | 0  | 1  | 0   | 0  | 0  | 0  |
| 1     | 1  | 0  | 0   | 0  | 0  | 0  |
| 0     | 0  | 1  | 0   | 0  | 0  | 0  |
| 0     | 1  | 1  | 0   | 0  | 0  | 1  |
| 0     | 0  | 1  | 0   | 0  | 0  | 0  |
| 0     | 0  | 1  | 0   | 0  | 0  | 0  |

| F6 | F7 | F8 | F9 | F10 | F12 | BS |
|----|----|----|----|-----|-----|----|
| 0  | 0  | 1  | 1  | 1   | 1   | 18 |
| 0  | 1  | 1  | 1  | 1   | 0   | 19 |
| 1  | 0  | 1  | 1  | 1   | 1   | 40 |
| 0  | 0  | 1  | 0  | 1   | 1   | 6  |
| 0  | 0  | 1  | 0  | 1   | 1   | 14 |
| 1  | 1  | 1  | 1  | 1   | 1   | 28 |
| 0  | 0  | 1  | 1  | 1   | 1   | 26 |
| 0  | 0  | 1  | 1  | 1   | 0   | 25 |
| 0  | 0  | 1  | 1  | 1   | 1   | 29 |
| 0  | 0  | 1  | 1  | 1   | 1   | 19 |
| 0  | 1  | 1  | 1  | 1   | 1   | 16 |
| 0  | 0  | 1  | 1  | 1   | 1   | 17 |
| 0  | 0  | 0  | 1  | 1   | 1   | 17 |
| 0  | 0  | 1  | 1  | 1   | 1   | 14 |
| 0  | 0  | 1  | 1  | 1   | 1   | 12 |
| 0  | 1  | 1  | 1  | 1   | 1   | 13 |
| 1  | 0  | 1  | 1  | 1   | 0   | 15 |
| 1  | 0  | 1  | 1  | 1   | 1   | 20 |
| 0  | 0  | 1  | 1  | 1   | 1   | 37 |
| 0  | 0  | 1  | 1  | 1   | 1   | 12 |
| 0  | 0  | 1  | 1  | 1   | 1   | 19 |
| 0  | 0  | 1  | 1  | 1   | 1   | 29 |
| 0  | 0  | 1  | 1  | 1   | 1   | 18 |
| 0  | 0  | 1  | 1  | 1   | 0   | 24 |
| 0  | 0  | 0  | 0  | 0   | 0   | 6  |
| 0  | 0  | 0  | 0  | 0   | 0   | 3  |
| 0  | 0  | 0  | 0  | 0   | 0   | 2  |
| 0  | 0  | 0  | 0  | 0   | 0   | 5  |
| 0  | 0  | 0  | 0  | 0   | 0   | 1  |
| 0  | 0  | 1  | 0  | 0   | 0   | 7  |
| 0  | 0  | 0  | 0  | 0   | 0   | 1  |
| 0  | 0  | 0  | 0  | 0   | 0   | 3  |
| 0  | 0  | 0  | 0  | 0   | 0   | 4  |
| 0  | 0  | 0  | 0  | 0   | 0   | 2  |
| 0  | 0  | 0  | 0  | 0   | 0   | 1  |
| 0  | 0  | 0  | 0  | 0   | 0   | 2  |
| 0  | 0  | 0  | 0  | 0   | 0   | 3  |
| 0  | 0  | 0  | 0  | 0   | 0   | 0  |
| 0  | 0  | 0  | 0  | 0   | 0   | 0  |
| 0  | 0  | 0  | 0  | 0   | 0   | 1  |
| 0  | 0  | 0  | 0  | 0   | 0   | 0  |
| 0  | 0  | 0  | 0  | 0   | 0   | 2  |
| 0  | 0  | 1  | 0  | 0   | 0   | 1  |
| 0  | 1  | 0  | 0  | 0   | 0   | 0  |
| 0  | 0  | 0  | 0  | 0   | 0   | 1  |
| 0  | 0  | 0  | 0  | 0   | 0   | 3  |
| 0  | 0  | 0  | 0  | 0   | 0   | 0  |
| 0  | 0  | 0  | 0  | 0   | 0   | 1  |

| MINBS | JMBER_TEETH | DIAGNOSE | GBI | PCR | BOP | TRANEX |
|-------|-------------|----------|-----|-----|-----|--------|
| 17    | 28          | 0        | 2   | 26  | 7   | 0      |
| 25    | 23          | 2        | 10  | 49  | 12  | 0      |
| 33    | 27          | 4        | 16  | 39  | 20  | 0      |
| 13    | 20          | 2        | 11  | 31  | 6   | 0      |
| 25    | 27          | 1        | 15  | 81  | 25  | 0      |
| 35    | 20          | 1        | 52  | 100 | 53  | 0      |
| 27    | 28          | 0        | 2   | 20  | 1   | 0      |
| 18    | 27          | 0        | 4   | 37  | 5   | 0      |
| 35    | 27          | 0        | 8   | 28  | 6   | 0      |
| 30    | 27          | 4        | 8   | 100 | 20  | 0      |
| 37    | 26          | 1        | 8   | 33  | 11  | 0      |
| 32    | 27          | 0        | 9   | 57  | 18  | 1      |
| 38    | 26          | 3        | 10  | 74  | 19  | 0      |
| 26    | 28          | 2        | 5   | 57  | 10  | 0      |
| 24    | 31          | 0        | 6   | 58  | 12  | 0      |
| 20    | 30          | 0        | 15  | 83  | 18  | 0      |
| 25    | 21          | 1        | 20  | 54  | 21  | 0      |
| 35    | 29          | 1        | 5   | 54  | 14  | 0      |
| 43    | 27          | 0        | 5   | 26  | 14  | 0      |
| 25    | 28          | 0        | 5   | 45  | 7   | 0      |
| 22    | 27          | 0        | 10  | 68  | 8   | 0      |
| 27    | 28          | 4        | 12  | 86  | 14  | 0      |
| 25    | 29          | 3        | 7   | 41  | 14  | 0      |
| 35    | 30          | 0        | 8   | 26  | 13  | 0      |
| 12    | 30          | 3        | 12  | 60  | 15  | 0      |
| 10    | 26          | 0        | 12  | 53  | 18  | 0      |
| 15    | 28          | 0        | 6   | 50  | 9   | 0      |
| 9     | 28          | 0        | 5   | 38  | 7   | 0      |
| 9     | 28          | 0        | 8   | 32  | 7   | 0      |
| 15    | 28          | 3        | 10  | 48  | 12  | 0      |
| 10    | 28          | 2        | 4   | 53  | 10  | 0      |
| 12    | 26          | 1        | 12  | 68  | 17  | 0      |
| 10    | 23          | 2        | 8   | 58  | 10  | 0      |
| 13    | 28          | 0        | 9   | 58  | 13  | 0      |
| 9     | 28          | 0        | 12  | 77  | 15  | 0      |
| 12    | 28          | 4        | 11  | 53  | 14  | 0      |
| 13    | 27          | 1        | 8   | 46  | 14  | 0      |
| 10    | 23          | 2        | 25  | 78  | 25  | 0      |
| 9     | 28          | 4        | 8   | 45  | 17  | 0      |
| 12    | 26          | 0        | 6   | 40  | 15  | 0      |
| 10    | 22          | 1        | 8   | 56  | 18  | 0      |
| 10    | 26          | 1        | 8   | 30  | 10  | 0      |
| 12    | 28          | 0        | 2   | 20  | 4   | 0      |
| 10    | 22          | 1        | 16  | 80  | 18  | 0      |
| 13    | 29          | 0        | 2   | 30  | 4   | 0      |
| 15    | 27          | 4        | 6   | 35  | 10  | 0      |
| 10    | 28          | 0        | 8   | 45  | 7   | 0      |
| 12    | 27          | 0        | 5   | 35  | 5   | 0      |

| SUMPD | PD_MEAN | CAL_MEAN | PD14 | PD56 | PD7 | STBOP |
|-------|---------|----------|------|------|-----|-------|
| 195   | 1,04    | 0,78     | 100  | 0    | 0   | 24    |
| 283   | 2,05    | 2,13     | 98   | 2    | 0   | 60    |
| 387,8 | 2,38    | 2,64     | 85   | 15   | 0   | 138   |
| 217   | 1,8     | 1,98     | 97   | 3    | 0   | 21    |
| 230,2 | 1,47    | 1,51     | 100  | 0    | 0   | 67    |
| 207,8 | 1,73    | 1,8      | 100  | 0    | 0   | 127   |
| 240,4 | 1,42    | 1,02     | 100  | 0    | 0   | 4     |
| 260   | 1,6     | 1,46     | 100  | 0    | 0   | 13    |
| 281,2 | 1,73    | 1,65     | 100  | 0    | 0   | 20    |
| 613   | 3,78    | 3,81     | 88   | 12   | 0   | 118   |
| 278   | 1,78    | 1,83     | 100  | 0    | 0   | 40    |
| 232,2 | 1,43    | 1,48     | 100  | 0    | 0   | 50    |
| 494   | 3,16    | 3,16     | 100  | 0    | 0   | 118   |
| 305,2 | 1,81    | 1,98     | 100  | 0    | 0   | 32    |
| 303,4 | 1,62    | 1,64     | 100  | 0    | 0   | 37    |
| 223,2 | 1,19    | 1,19     | 100  | 0    | 0   | 41    |
| 199   | 1,57    | 1,57     | 100  | 0    | 0   | 54    |
| 309   | 1,77    | 1,79     | 100  | 0    | 0   | 60    |
| 271,4 | 1,62    | 1,77     | 100  | 0    | 0   | 47    |
| 223,6 | 1,33    | 1,32     | 100  | 0    | 0   | 17    |
| 238,8 | 1,47    | 1,46     | 100  | 0    | 0   | 26    |
| 408,4 | 2,43    | 2,77     | 97   | 3    | 0   | 79    |
| 427,2 | 2,45    | 2,45     | 100  | 0    | 0   | 76    |
| 250,2 | 1,39    | 1,39     | 100  | 0    | 0   | 37    |
| 509,8 | 2,83    | 2,83     | 100  | 0    | 0   | 89    |
| 243,4 | 1,59    | 1,35     | 100  | 0    | 0   | 46    |
| 233,8 | 1,39    | 1,11     | 100  | 0    | 0   | 26    |
| 247,4 | 1,47    | 1,24     | 100  | 0    | 0   | 21    |
| 230,2 | 1,37    | 1,02     | 100  | 0    | 0   | 19    |
| 438,2 | 2,6     | 2,61     | 100  | 0    | 0   | 65    |
| 356,4 | 2,12    | 2,11     | 92   | 8    | 0   | 67    |
| 315,2 | 2,02    | 2,02     | 100  | 0    | 0   | 65    |
| 282,8 | 2,04    | 2,09     | 99   | 1    | 0   | 42    |
| 276,2 | 1,64    | 1,62     | 100  | 0    | 0   | 35    |
| 279,2 | 1,66    | 1,66     | 100  | 0    | 0   | 52    |
| 469   | 2,79    | 2,79     | 98   | 2    | 0   | 92    |
| 256,2 | 1,52    | 1,53     | 100  | 0    | 0   | 47    |
| 322   | 2,33    | 2,37     | 85   | 15   | 0   | 124   |
| 270,4 | 1,69    | 2,68     | 98   | 2    | 0   | 68    |
| 250,2 | 1,54    | 1,54     | 100  | 0    | 0   | 46    |
| 224   | 1,69    | 2,1      | 100  | 0    | 0   | 53    |
| 306   | 1,96    | 1,97     | 100  | 0    | 0   | 37    |
| 253,4 | 1,5     | 1,5      | 100  | 0    | 0   | 12    |
| 283   | 2,14    | 2,14     | 100  | 0    | 0   | 66    |
| 248,8 | 1,42    | 1,42     | 100  | 0    | 0   | 12    |
| 518,2 | 3,19    | 3,32     | 96   | 4    | 0   | 70    |
| 280   | 1,66    | 1,66     | 100  | 0    | 0   | 22    |
| 266,2 | 1,64    | 1,64     | 100  | 0    | 0   | 17    |

| CPD | PISA    | HAEM1 | HAEM2 | HAEM3 | HAEM4 | HAEM5 |
|-----|---------|-------|-------|-------|-------|-------|
| 0   | 41,159  | 3     | 1     | 1     | 1     | 0     |
| 52  | 121,433 | 0     | 1     | 3     | 1     | 2     |
| 169 | 506,065 | 3     | 1     | 1     | 1     | 3     |
| 25  | 90,325  | 0     | 1     | 0     | 1     | 0     |
| 0   | 166,993 | 0     | 1     | 0     | 1     | 0     |
| 0   | 300,175 | 0     | 4     | 1     | 1     | 2     |
| 0   | 10,031  | 2     | 4     | 1     | 2     | 0     |
| 0   | 32,871  | 3     | 1     | 3     | 1     | 2     |
| 0   | 54,102  | 4     | 4     | 4     | 1     | 4     |
| 444 | 435,271 | 1     | 1     | 1     | 1     | 4     |
| 8   | 113,151 | 1     | 1     | 0     | 1     | 1     |
| 0   | 144,077 | 3     | 1     | 1     | 1     | 0     |
| 228 | 321,312 | 0     | 1     | 0     | 1     | 0     |
| 4   | 104,865 | 3     | 3     | 1     | 3     | 0     |
| 0   | 107,127 | 3     | 1     | 1     | 0     | 0     |
| 0   | 134,899 | 1     | 1     | 3     | 1     | 0     |
| 4   | 123,283 | 0     | 2     | 1     | 1     | 0     |
| 24  | 142,516 | 4     | 1     | 3     | 1     | 0     |
| 4   | 113,433 | 4     | 3     | 1     | 4     | 4     |
| 0   | 60,166  | 1     | 2     | 1     | 1     | 0     |
| 0   | 55,425  | 0     | 2     | 0     | 0     | 0     |
| 54  | 210,82  | 4     | 2     | 3     | 1     | 4     |
| 60  | 216,778 | 1     | 2     | 1     | 1     | 0     |
| 0   | 100,165 | 0     | 3     | 2     | 1     | 0     |
| 96  | 222,995 | 0     | 1     | 0     | 1     | 0     |
| 0   | 121,538 | 0     | 1     | 1     | 1     | 0     |
| 0   | 55,512  | 0     | 1     | 0     | 0     | 0     |
| 0   | 52,096  | 0     | 1     | 0     | 0     | 0     |
| 0   | 41,109  | 0     | 1     | 0     | 0     | 0     |
| 44  | 209,106 | 0     | 1     | 0     | 1     | 0     |
| 89  | 287,024 | 0     | 1     | 0     | 0     | 0     |
| 4   | 173,149 | 1     | 1     | 1     | 0     | 0     |
| 23  | 105,995 | 0     | 1     | 0     | 0     | 1     |
| 0   | 106,073 | 0     | 1     | 1     | 0     | 0     |
| 0   | 132,71  | 1     | 0     | 0     | 0     | 0     |
| 127 | 277,748 | 1     | 1     | 0     | 0     | 0     |
| 16  | 143,86  | 1     | 1     | 0     | 0     | 0     |
| 101 | 417,71  | 0     | 0     | 0     | 0     | 0     |
| 25  | 70,782  | 0     | 0     | 0     | 0     | 0     |
| 0   | 105,472 | 0     | 1     | 0     | 0     | 0     |
| 24  | 111,694 | 0     | 0     | 0     | 0     | 0     |
| 8   | 94,538  | 1     | 1     | 0     | 0     | 0     |
| 0   | 24,508  | 0     | 1     | 0     | 0     | 0     |
| 28  | 165,173 | 0     | 0     | 0     | 0     | 0     |
| 0   | 32,24   | 0     | 1     | 0     | 0     | 0     |
| 210 | 197,083 | 0     | 1     | 0     | 1     | 0     |
| 0   | 77      | 0     | 0     | 0     | 0     | 0     |
| 0   | 41,736  | 0     | 1     | 0     | 0     | 0     |

| HAEM6 | HAEM7 | HAEM8 | HAEM9 | HAEM10 | HAEM11 | HAEM12 |
|-------|-------|-------|-------|--------|--------|--------|
| 0     | 4     | 4     | 1     | 3      | 0      | 0      |
| 3     | 4     | 4     | 1     | 0      | 0      | 0      |
| 3     | 4     | 4     | 4     | 4      | 4      | 4      |
| 0     | 3     | 0     | 0     | 0      | 1      | 0      |
| 2     | 3     | 4     | 2     | 0      | 0      | 0      |
| 2     | 3     | 4     | 4     | 3      | 2      | 0      |
| 0     | 4     | 4     | 0     | 3      | 4      | 1      |
| 2     | 4     | 4     | 0     | 0      | 1      | 4      |
| 0     | 4     | 4     | 0     | 0      | 1      | 3      |
| 0     | 4     | 3     | 0     | 0      | 0      | 3      |
| 0     | 3     | 3     | 4     | 2      | 0      | 0      |
| 1     | 4     | 4     | 0     | 0      | 1      | 0      |
| 0     | 3     | 4     | 3     | 3      | 0      | 0      |
| 0     | 4     | 0     | 0     | 0      | 3      | 0      |
| 0     | 2     | 0     | 2     | 3      | 0      | 0      |
| 0     | 3     | 4     | 0     | 0      | 0      | 0      |
| 2     | 3     | 4     | 1     | 0      | 1      | 0      |
| 2     | 4     | 4     | 1     | 0      | 0      | 0      |
| 2     | 4     | 4     | 4     | 0      | 3      | 4      |
| 0     | 4     | 0     | 3     | 0      | 0      | 0      |
| 2     | 4     | 4     | 4     | 3      | 0      | 0      |
| 3     | 4     | 3     | 2     | 2      | 0      | 0      |
| 0     | 3     | 4     | 3     | 3      | 0      | 0      |
| 3     | 3     | 4     | 4     | 0      | 3      | 0      |
| 2     | 2     | 0     | 0     | 0      | 0      | 0      |
| 0     | 0     | 0     | 0     | 0      | 0      | 0      |
| 0     | 0     | 0     | 0     | 0      | 1      | 0      |
| 2     | 1     | 0     | 0     | 0      | 0      | 1      |
| 0     | 0     | 0     | 0     | 0      | 0      | 0      |
| 1     | 0     | 0     | 3     | 0      | 1      | 0      |
| 0     | 0     | 0     | 0     | 0      | 0      | 0      |
| 0     | 0     | 0     | 0     | 0      | 0      | 0      |
| 0     | 1     | 1     | 0     | 0      | 0      | 0      |
| 0     | 0     | 0     | 0     | 0      | 0      | 0      |
| 0     | 0     | 0     | 0     | 0      | 0      | 0      |
| 0     | 0     | 0     | 0     | 0      | 0      | 0      |
| 0     | 0     | 0     | 0     | 0      | 0      | 0      |
| 0     | 0     | 0     | 0     | 0      | 0      | 0      |
| 0     | 0     | 0     | 0     | 0      | 0      | 0      |
| 0     | 0     | 0     | 0     | 0      | 1      | 0      |
| 0     | 0     | 0     | 0     | 0      | 0      | 0      |
| 0     | 0     | 0     | 0     | 0      | 0      | 0      |
| 0     | 0     | 0     | 0     | 0      | 0      | 0      |
| 0     | 0     | 0     | 0     | 0      | 0      | 0      |
| 0     | 0     | 0     | 0     | 0      | 0      | 0      |
| 0     | 0     | 0     | 0     | 0      | 0      | 0      |
| 0     | 0     | 0     | 0     | 0      | 0      | 0      |
| 0     | 0     | 0     | 1     | 0      | 0      | 0      |
| 0     | 0     | 0     | 0     | 0      | 0      | 0      |
| 0     | 0     | 0     | 0     | 0      | 0      | 0      |
